# Supplementary material for: Influence of carbon nanomaterial defects on the formation of protein corona
Source: Royal Society of Chemistry journal article supplement (doi:10.1039/c5ra15007h), 2015-01-01
Supplement: c5ra15007h1.pdf [file c5ra15007h1.pdf]

## Supplementary Information

### Influence of nanomaterials defects on the formation of protein corona

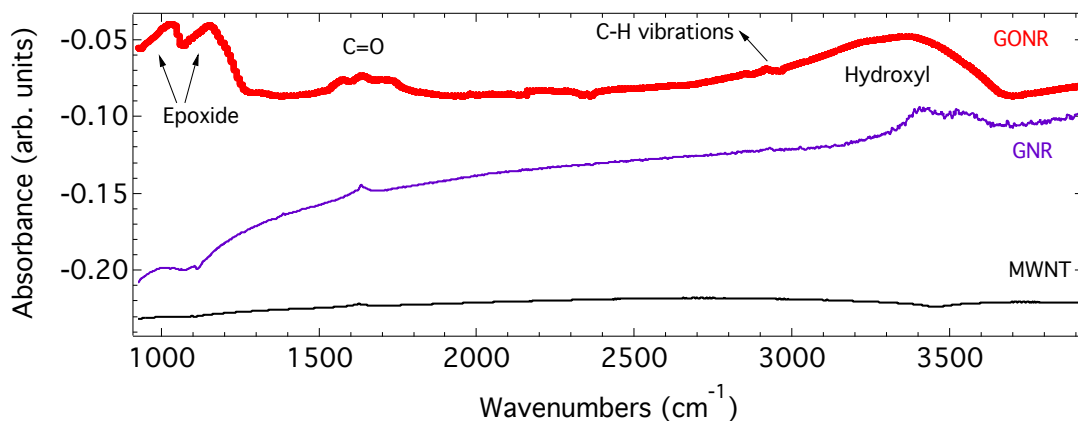

Figure S1: FTIR spectra for MWNTs, GNRs, and GONRs show the presence of polar functional groups on GONRs that make it strongly hydrophilic.

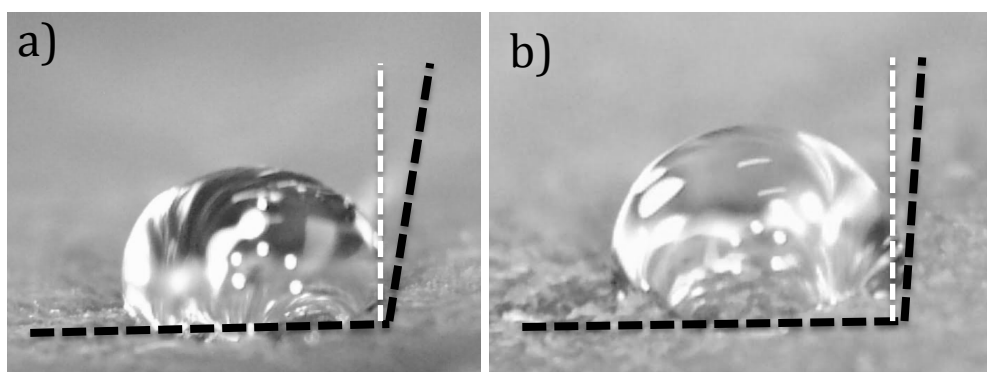

Figure S2: The contact angle for MWNTs (a) and GNRs (b) is >90° due to their hydrophobic nature. GONRs adsorb water very rapidly due to the presence of hydroxyl and carboxyl functional groups.

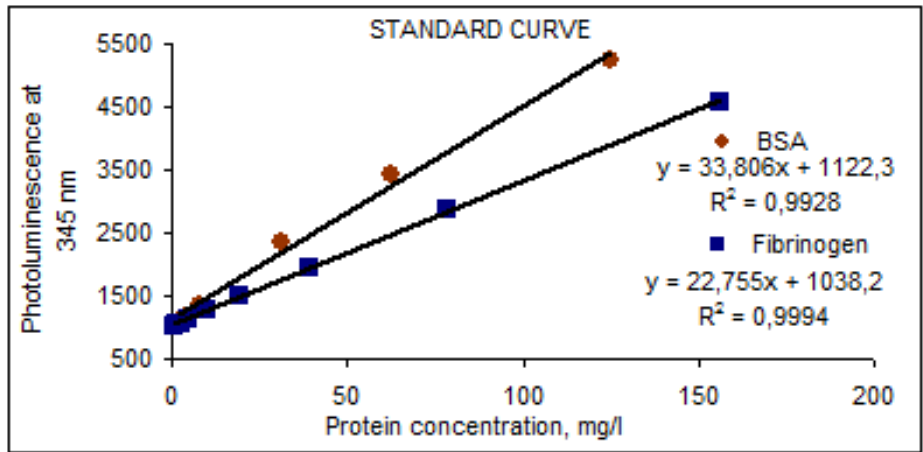

Figure S3: A standard curve obtained from photoluminescence of aromatic acids in BSA and fibrinogen could be used to measure the amount of adsorbed protein.
